# Supplementary material
Source: PubMed Central journal article supplement (PMC7610403)
Supplement: EMS118468-supplement-Supplementary_Figures_and_Table_3.pdf [file EMS118468-supplement-Supplementary_Figures_and_Table_3.pdf]

# Supplementary Figure 1

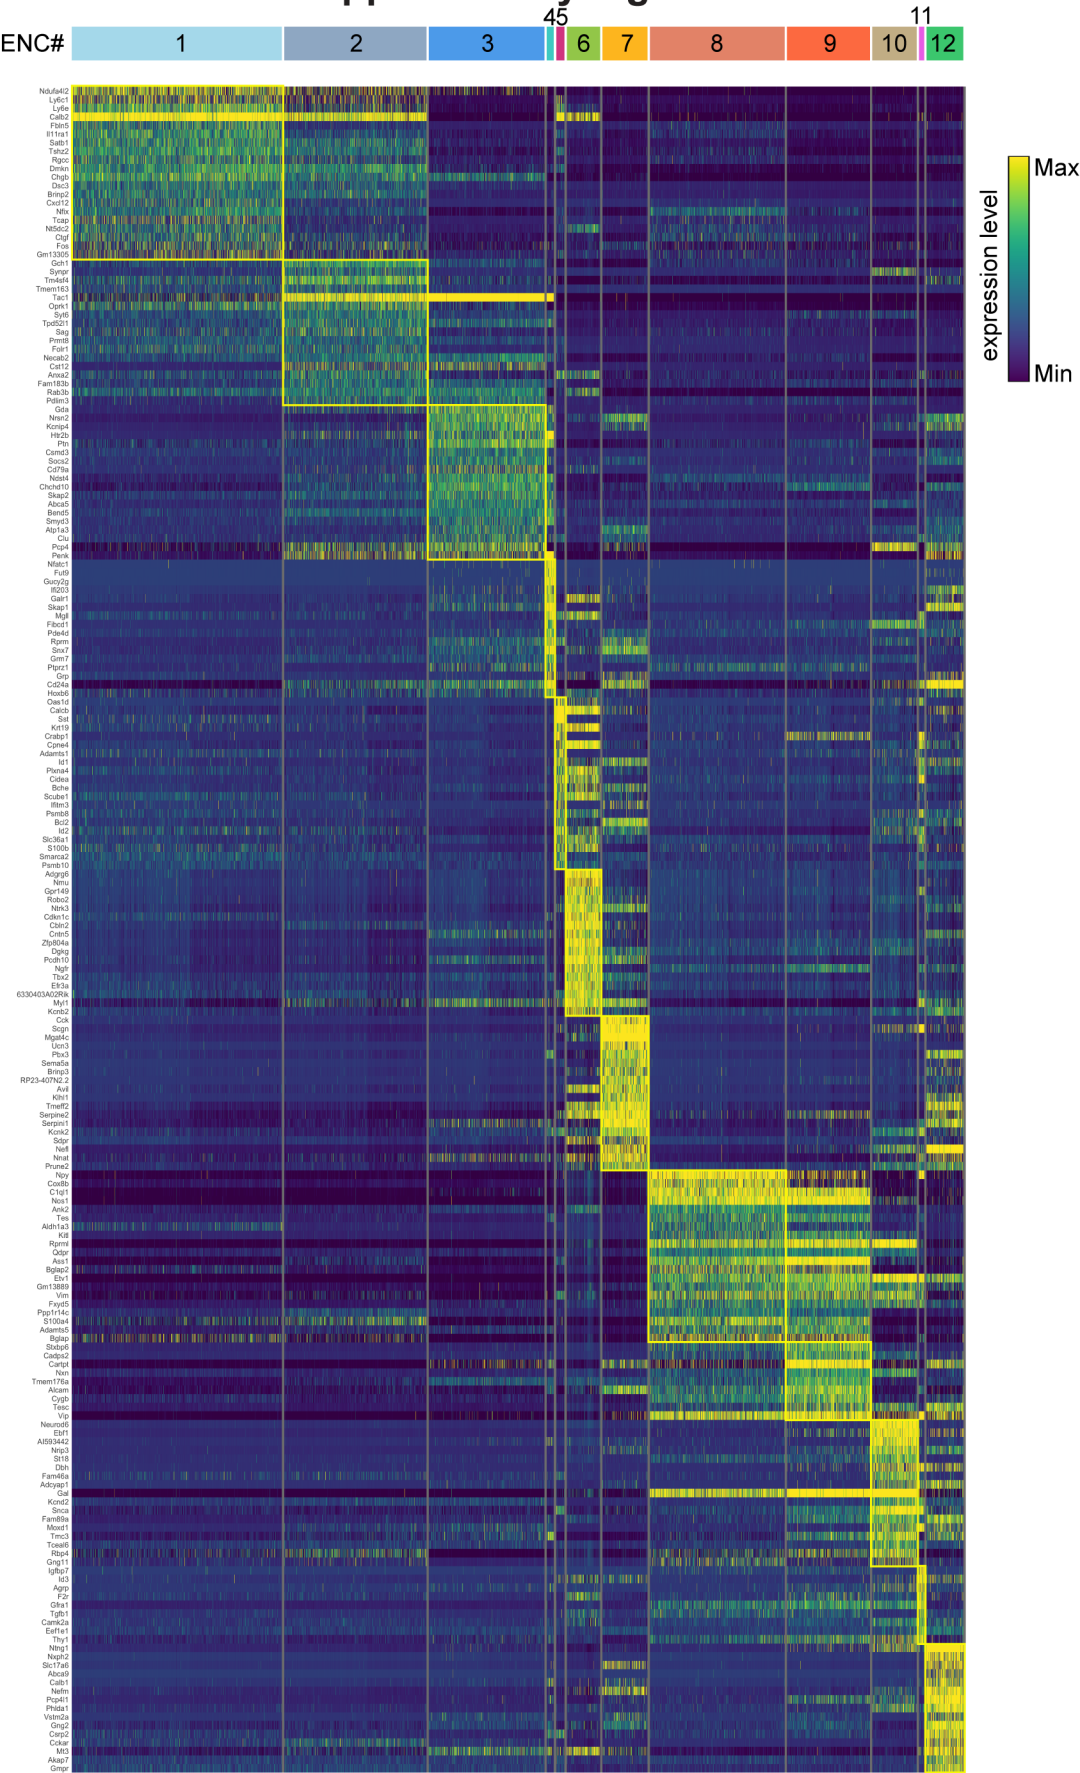

Supplementary Figure 1: Heatmap representing top-20 (by average logFC) differentially expressed genes of each ENC. Related to Figure 1.

ENC: Enteric Neuron Class

# Supplementary Figure 2

## a) Neurotransmission

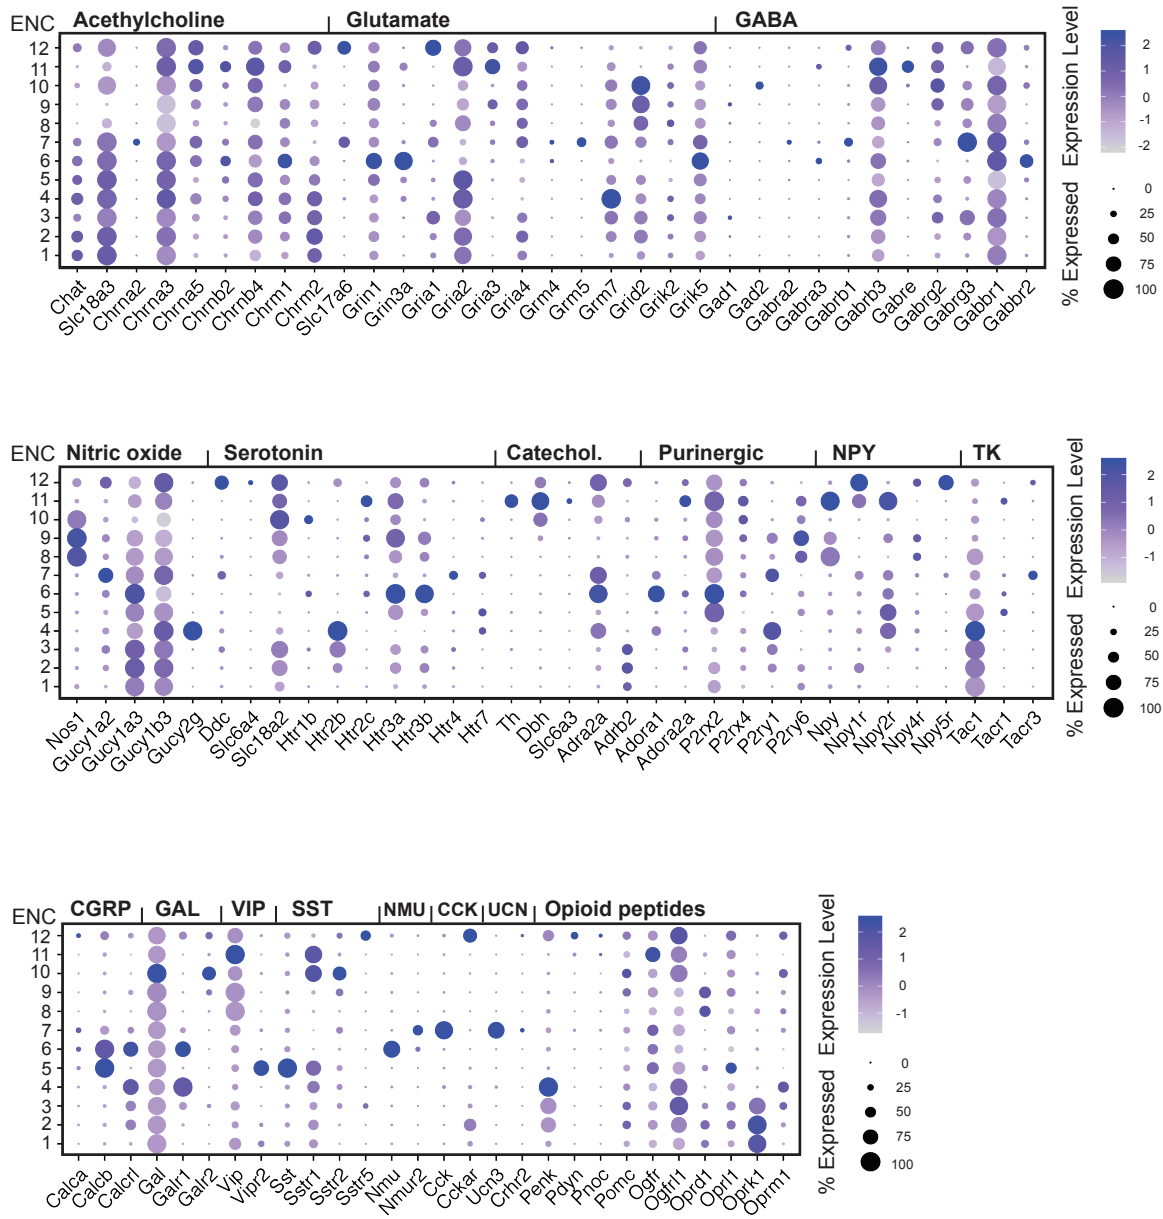

## b) Cell-Cell Signaling

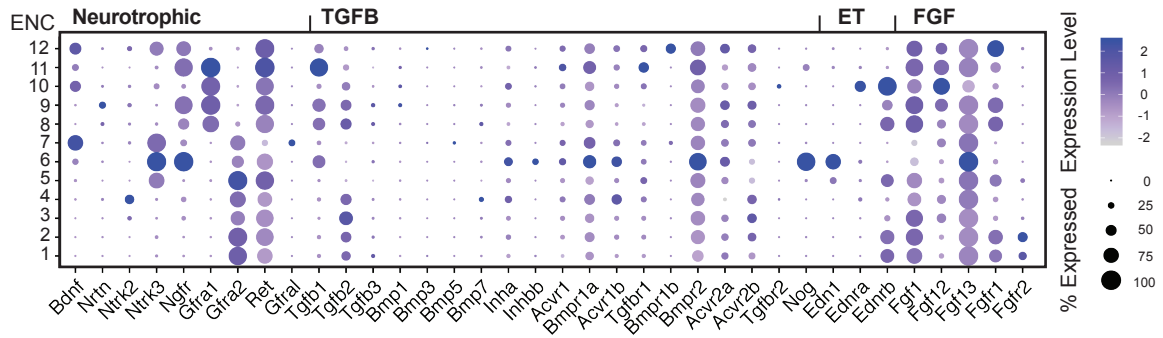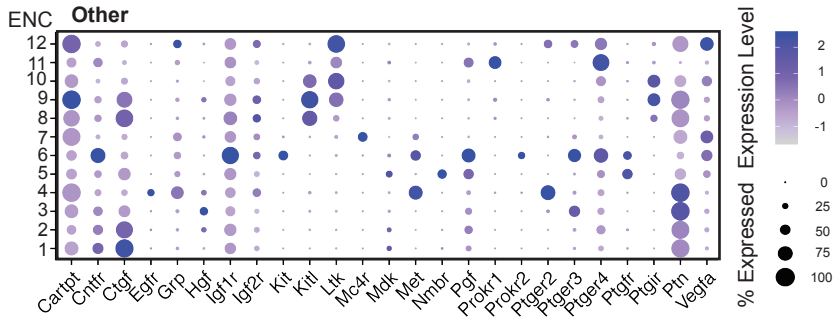

### c) Transcription Factors

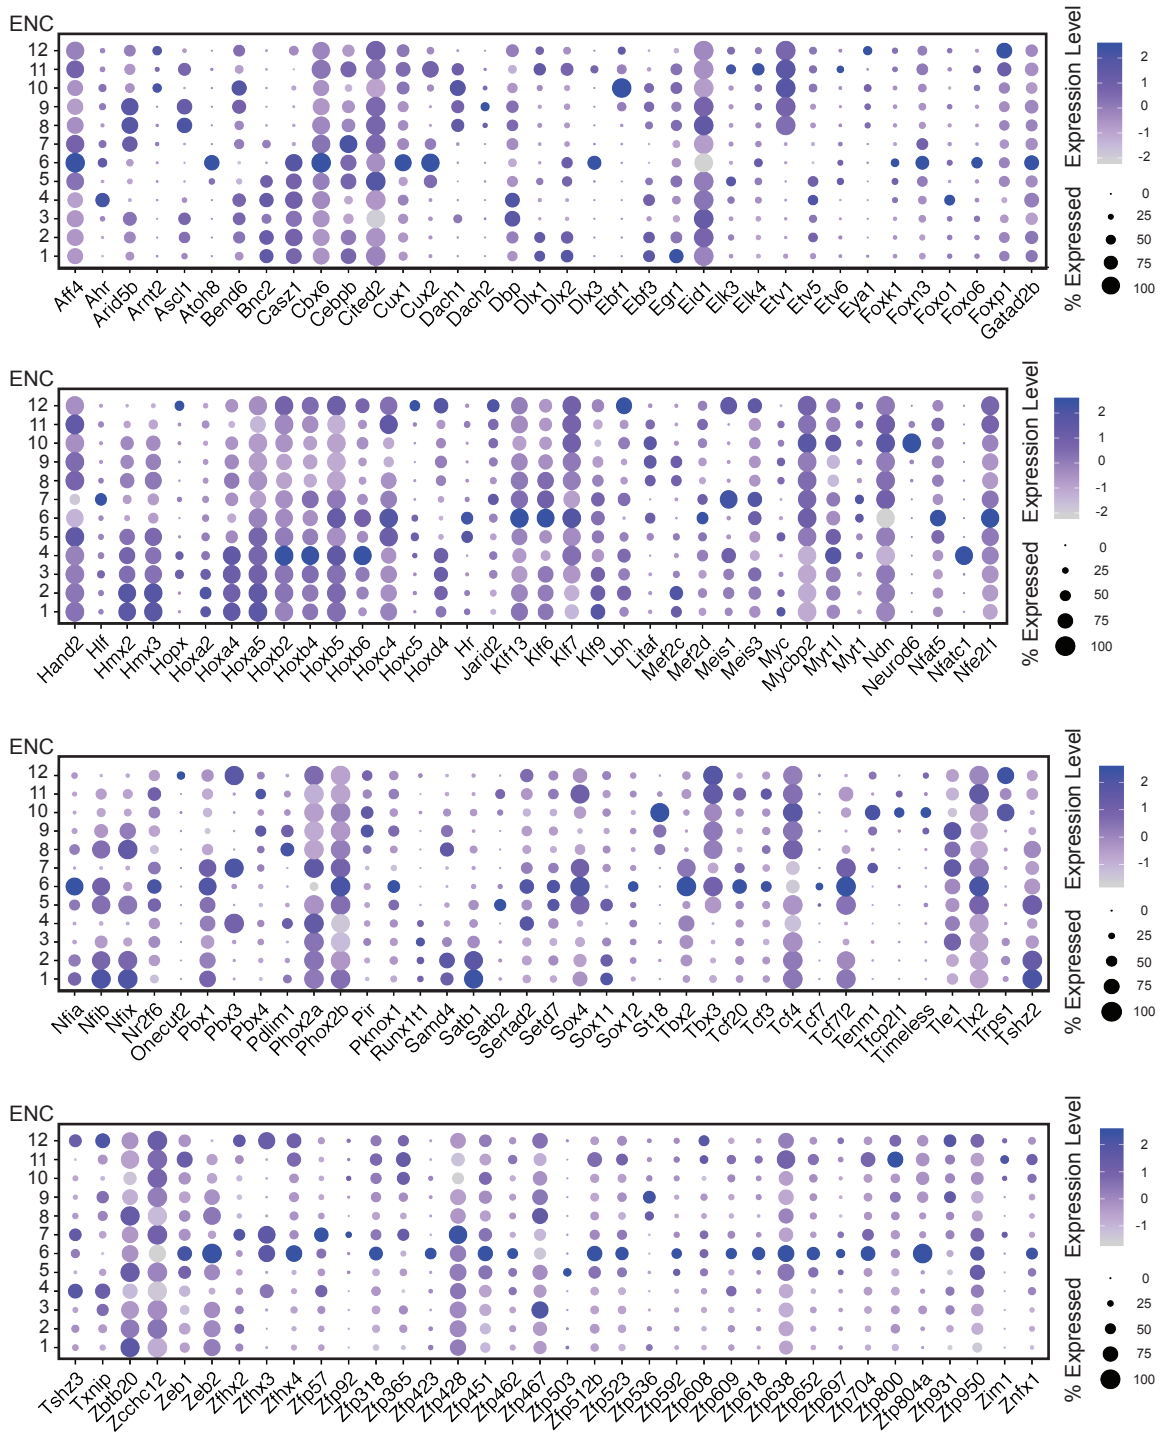

d) Adhesion Molecules

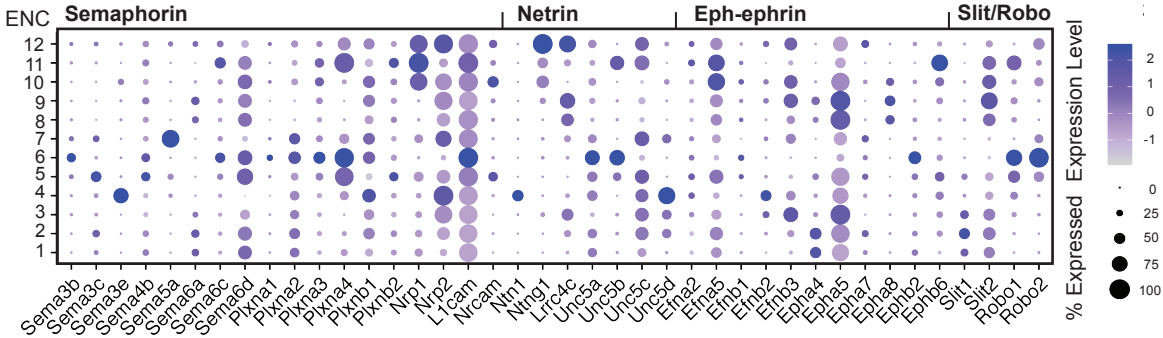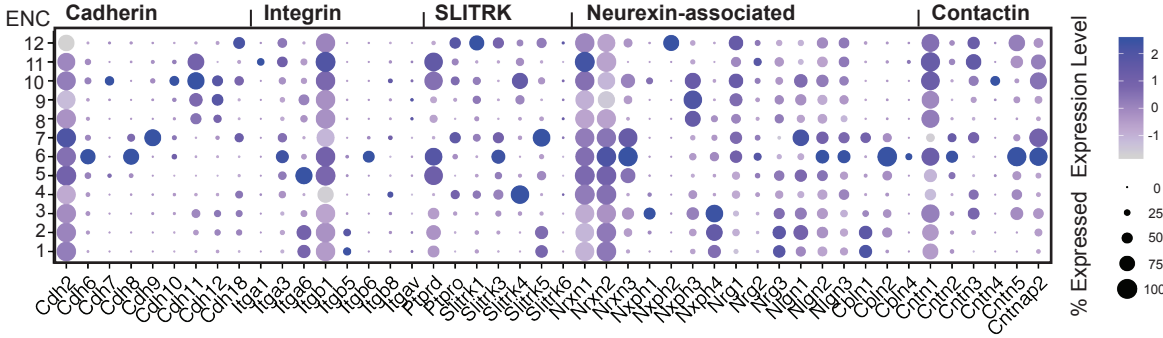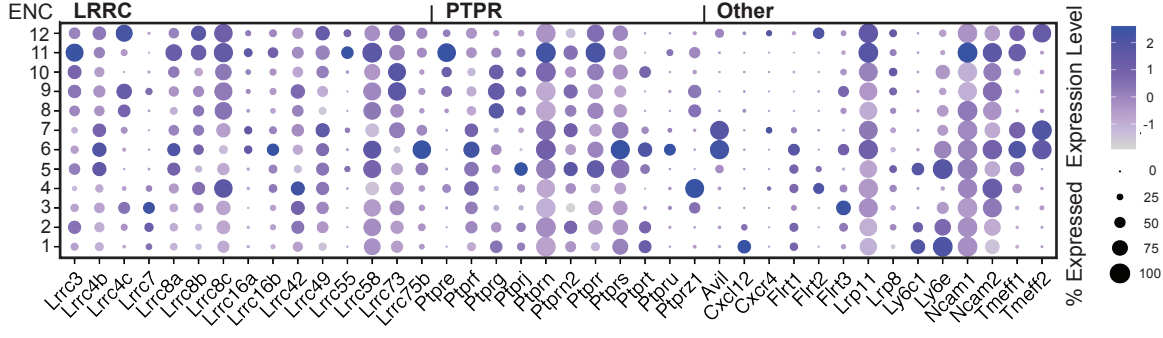

## e) Ion Channels

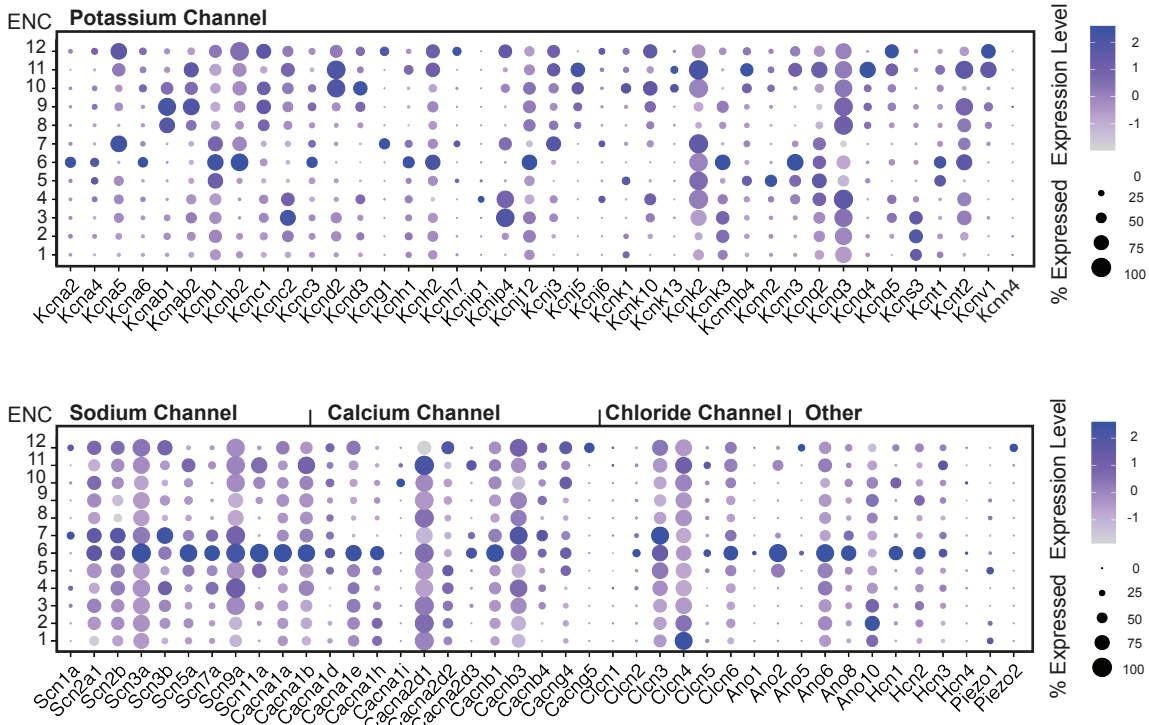

## f) Membrane Trafficking

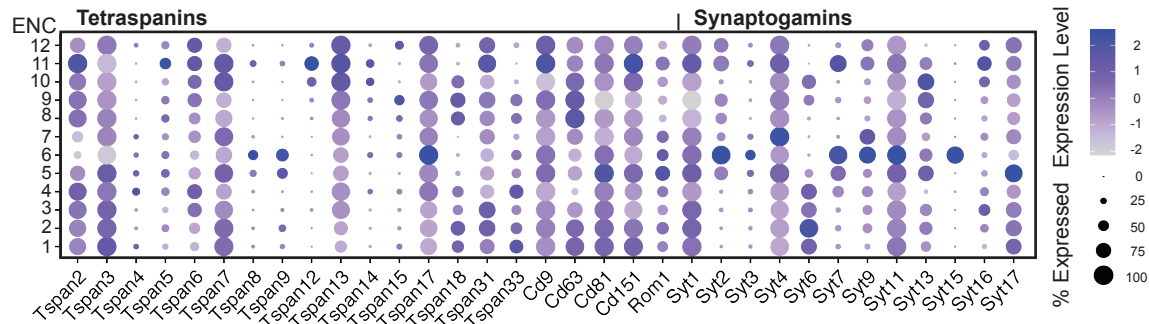

**Supplementary Figure 2. Dot plots displaying expression of genes conferring neuronal phenotypes in ENC1-12.**

Gene categories involved in a) neurotransmission, b) other cell-cell signaling, c) transcription, d) adhesion e) ion transport, and f) membrane trafficking. Color scale represents z-score and dot size represent percent of cells with non-zero expression within a given class.

ENC: Enteric Neuron Class; GABA: Gamma-aminobutyric acid; NPY: Neuropeptide Y; TK: Tachykinin; CGRP: Calcitonin gene-related peptide; GAL: Galanin; VIP: Vasoactive intestinal peptide; SST: Somatostatin; NMU: Neuromedin U; CCK: Cholecystokinin; UCN: Urocortin; TGFB: Transforming growth factor beta; ET: Endothelin; FGF: Fibroblast growth factor; LRRC: Leucine Rich Repeat Containing; PTPR: Protein tyrosine phosphatase receptor.

## Supplementary Figure 3

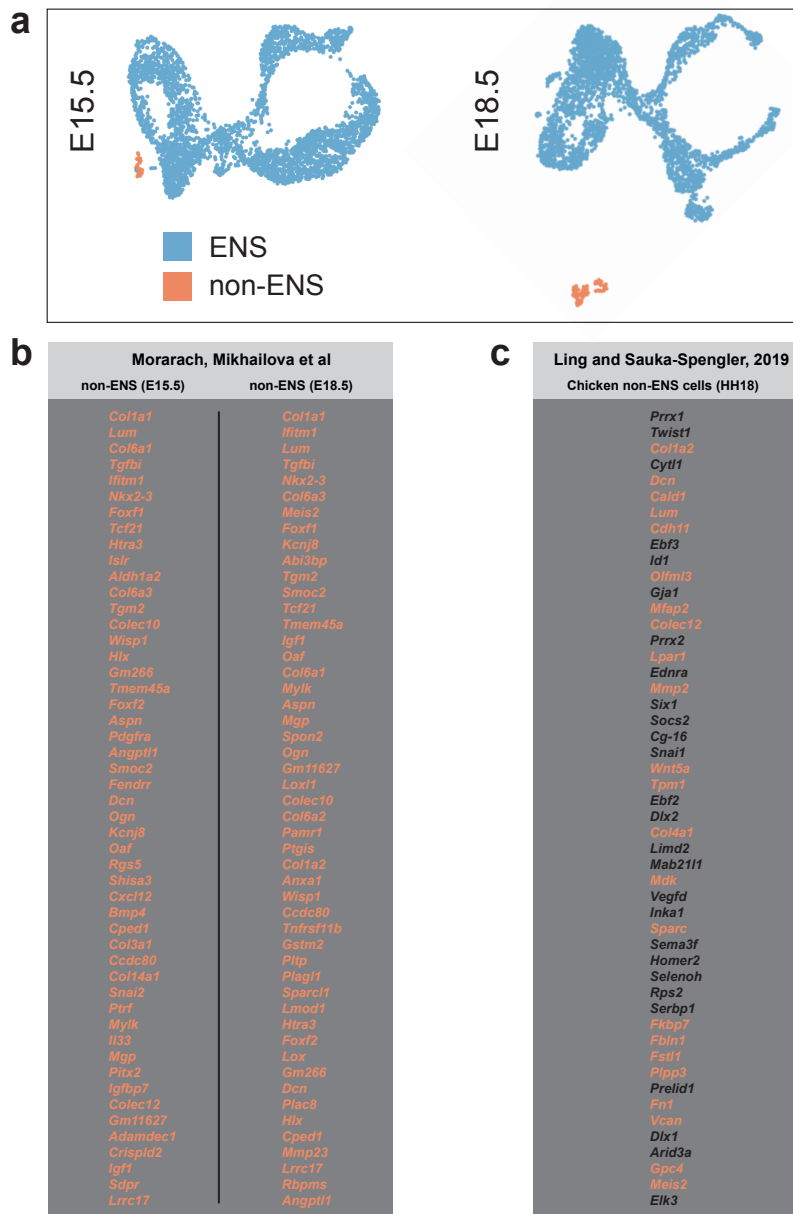

### Supplementary Figure 3: Non-ENS populations are fibroblast-like cells.

a) Non-ENS versus ENS cells indicated on UMAPs at E15.5 and E18.5.

b) Top 50 differentially expressed genes at each stage. The gene expression profiles indicate a precursor stage of previously published ENMFB<sup>1</sup> cells

(*Dpt+*/*Spon2+*/*Lum+*/*Dpt+*). Together, the data is in agreement with a contribution of mesenchymal fibroblast-like cells from neural crest. c) Table with top 50 differentially expressed genes in neural crest-derived mesenchymal cells captured from the developing chicken gut<sup>2</sup> at HH18 (approximately E11.5 in the mouse). Genes that were enriched in our non-ENS populations are marked in orange (46% of the genes).

HH: Hamburger-Hamilton stage; UMAP: Uniform Manifold Approximation and Projection.

### References:

- 1) Zeisel, A. et al. Molecular Architecture of the Mouse Nervous System. Cell 174, (2018)
- 2) Ling, ITC and Sauka-Spengler, T. Early chromatin shaping predetermines multipotent vagal neural crest into neural, neuronal and mesenchymal lineages. Nat Cell Biol 12 (2019)

# Supplementary Figure 4

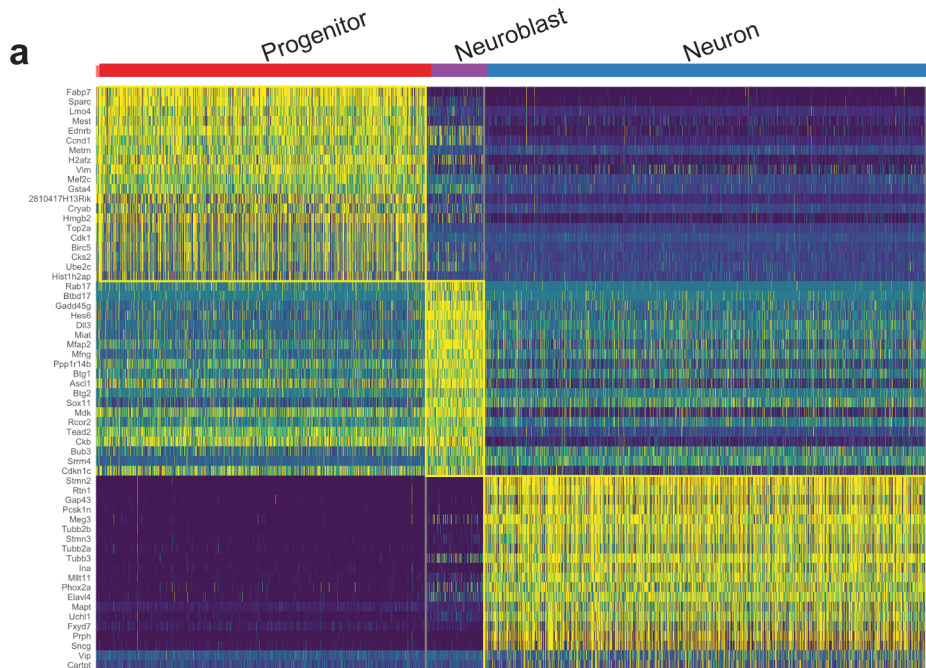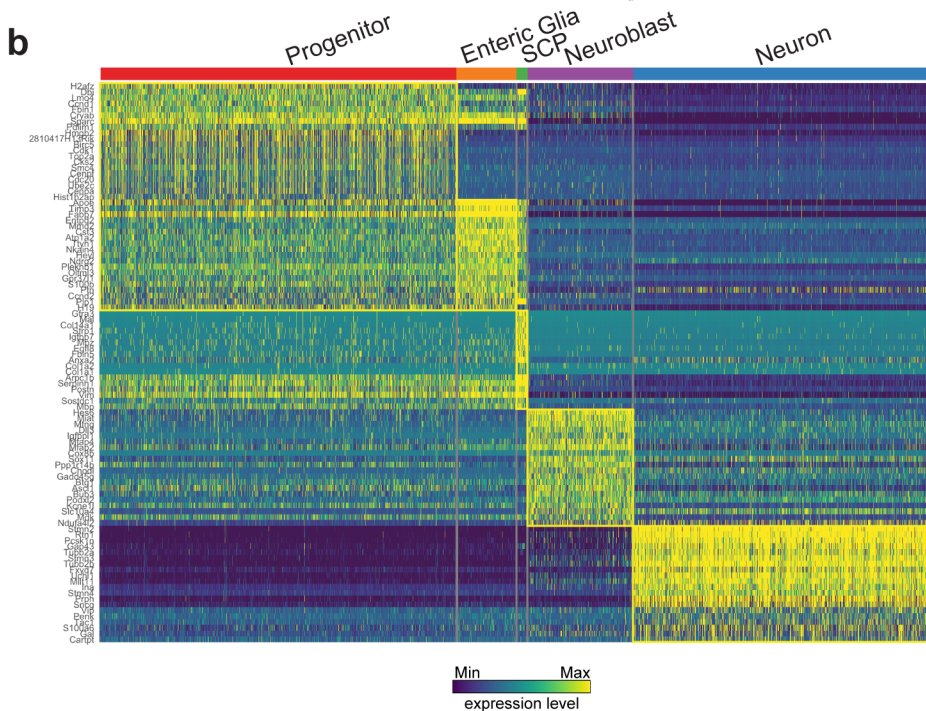

**Supplementary Figure 4: Heatmaps showing top marker genes for clusters representing generic cell states of the developing ENS. Related to Figure 5a and b. a) E15.5 b) E18.5. SCP: Schwann Cell Precursor**



## Supplementary Figure 5

**a**

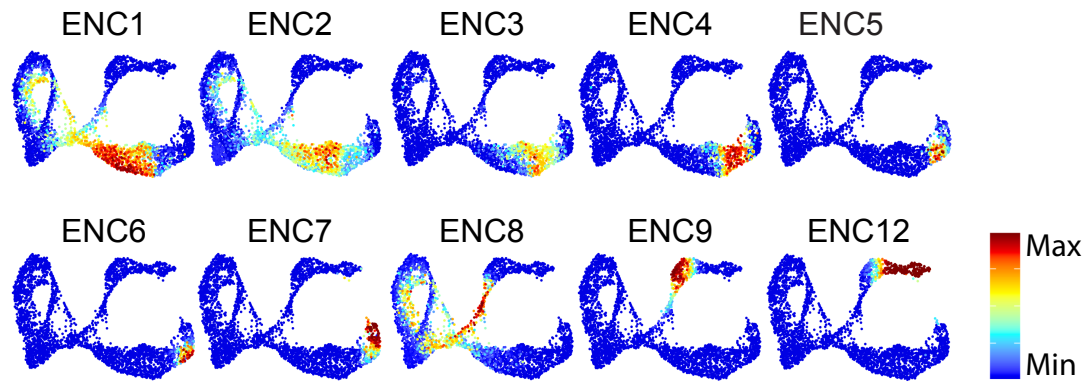

**b**

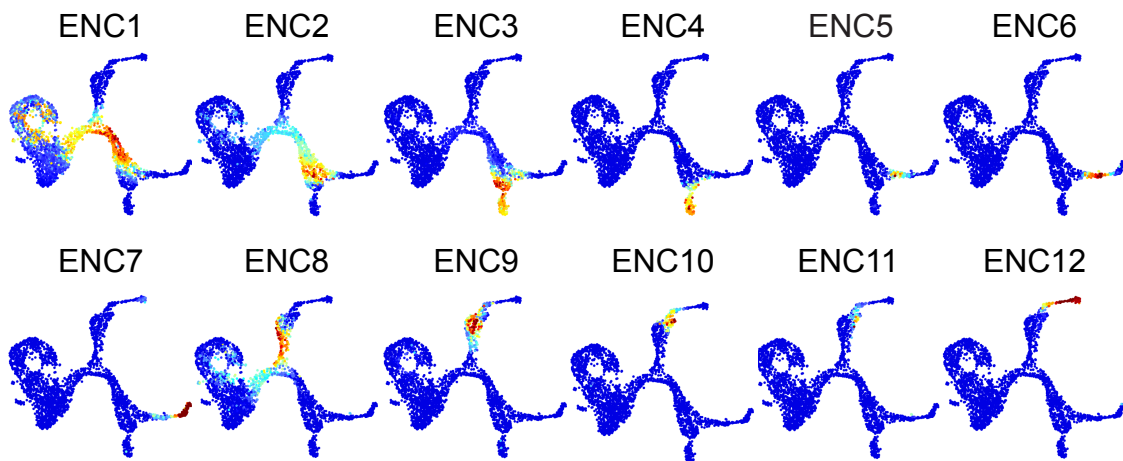

**Supplementary Figure 5: Individual identity transfers of ENC1-12 onto developing ENS.** Prediction scores shown on UMAPs at **a)** E15.5 and **b)** 18.5. Related to Figure 6a and b. UMAP: Uniform Manifold Approximation and Projection

## Supplementary Figure 6

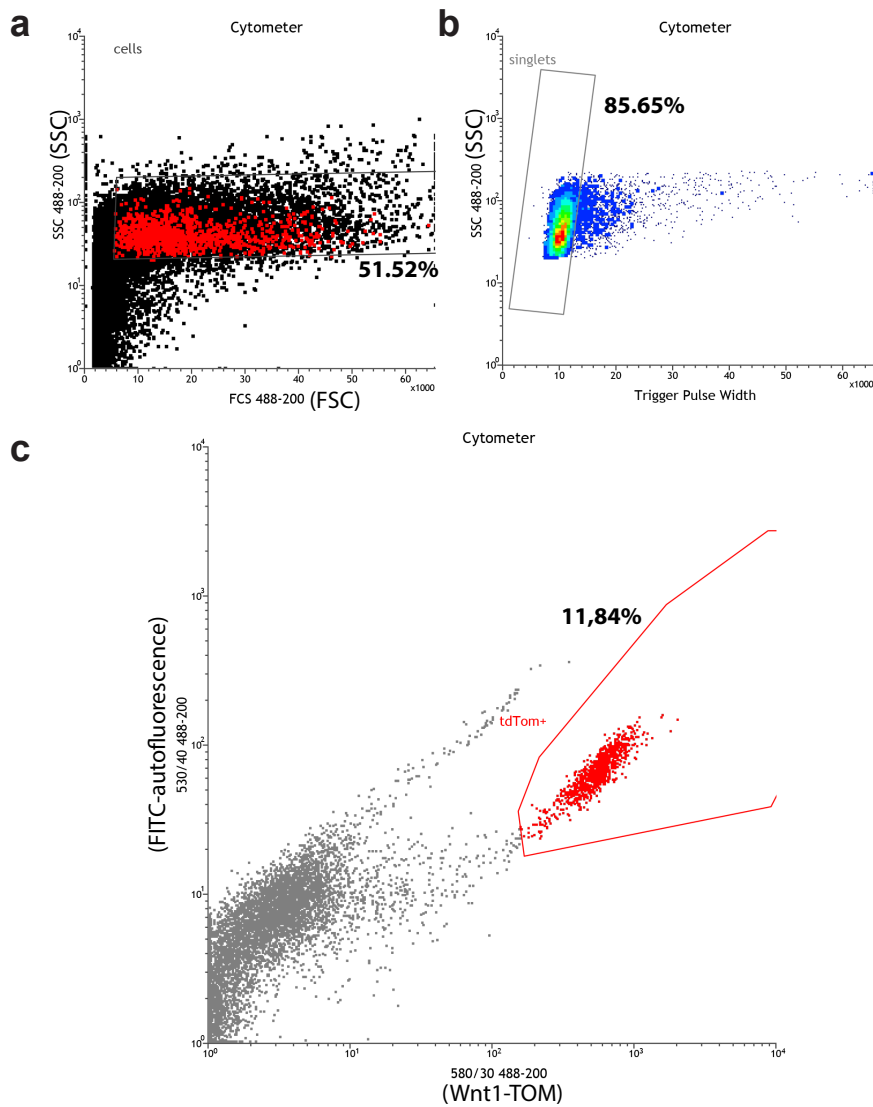

### Supplementary Figure 6: Representative Flow Cytometry Data Plots.

Plots show gating strategy for sorting TOM+ cells from *Wnt1-Cre;R26R-Tom* mice at E18.5. a) Forward vs Side Scatter plot gating on cells b) Side Scatter vs Trigger Pulse Width to gate out doublets and multiplets c) green fluorescence (530/40) vs red fluorescence (580/30) to distinguish true TOM+ cells from autofluorescent cells. Sorted cells are shown in red. SSC: Side-scattered light; FSC: Forward-scattered light

### SUPPLEMENTARY TABLE 3

#### Primary Antibodies used in the study

| Target   | Host   | Dilution  | Source                                                                                                                                                            | Comment:                        |
|----------|--------|-----------|-------------------------------------------------------------------------------------------------------------------------------------------------------------------|---------------------------------|
| 5-HT     | Goat   | 1:500     | Abcam ab66047                                                                                                                                                     |                                 |
| ANO1     | Rabbit | 1:1,000   | Abcam ab64085                                                                                                                                                     |                                 |
| ANO2     | Mouse  | 1:1,000   | Santa Cruz sc-390956                                                                                                                                              |                                 |
| CALB     | Rabbit | 1:1,000   | Chemicon AB1778                                                                                                                                                   | recognises Calretinin           |
| CALB     | Rabbit | 1:500     | Swant CB38a                                                                                                                                                       | recognises Calretinin           |
| CALB     | Mouse  | 1:500     | Swant CB300                                                                                                                                                       |                                 |
| CALB     | Goat   | 1:500     | R&D AF3320                                                                                                                                                        | recognises Calretinin           |
| CALR     | Mouse  | 1:500     | Santa Cruz sc-365956                                                                                                                                              |                                 |
| CALR     | Rabbit | 1:1,000   | Swant 7696                                                                                                                                                        |                                 |
| CCK      | Rabbit | 1:300     | Abcam ab83180                                                                                                                                                     | enhanced with colchicine        |
| CCK      | Rabbit | 1:16,000  | Immunostar 20078                                                                                                                                                  | enhanced with colchicine        |
| CGRP     | Goat   | 1:1,500   | AdBsero 1720-9007                                                                                                                                                 | enhanced with colchicine        |
| CGRP     | Rabbit | 1:5,000   | Sigma C8198                                                                                                                                                       | enhanced with colchicine        |
| DBH      | Rabbit | 1:1,000   | Immunostar 22806                                                                                                                                                  |                                 |
| ENK      | Rabbit | 1:3-6,000 | St John's STJ98660                                                                                                                                                |                                 |
| ENK      | Mouse  | 1:300     | Abcam ab150346                                                                                                                                                    |                                 |
| FUT9     | Rabbit | 1:300     | Novus Bio NBP2-57960                                                                                                                                              |                                 |
| GAD2     | Rabbit | 1:50,000  | Kind gift from J.Kaltschmidt; see Betley et al, Cell, 2009<br><a href="https://doi.org/10.1016/j.cell.2009.08.027">https://doi.org/10.1016/j.cell.2009.08.027</a> |                                 |
| GAL      | Goat   | 1:200     | Abcam ab99452                                                                                                                                                     | Weak staining in cell bodies    |
| GDA      | Rabbit | 1:1000    | Atlas Antibodies HPA024099                                                                                                                                        |                                 |
| GFP      | Goat   | 1:1,000   | Abcam ab6662                                                                                                                                                      | FITC-conjugated                 |
| HuC/D    | Mouse  | 1:300     | Molecular Probes A21271                                                                                                                                           |                                 |
| NDUFA4L2 | Rabbit | 1:200     | St John's STJ94374                                                                                                                                                | Weak staining in cell bodies    |
| NDUFA4L2 | Rabbit | 1:5,000   | St John's STJ116500                                                                                                                                               | Weak staining in cell bodies    |
| NEUROD6  | Rabbit | 1:100     | Abcam ab85824                                                                                                                                                     |                                 |
| NF-M     | Mouse  | 1:500     | Abcam ab7794                                                                                                                                                      |                                 |
| NMU      | Mouse  | 1:200     | Santa Cruz sc-398600                                                                                                                                              | Variable weak                   |
| NMU      | Rabbit | 1:200     | St John's STJ116312                                                                                                                                               | Variable weak, only on sections |
| NOS1     | Goat   | 1:1,000   | Abcam ab1376                                                                                                                                                      |                                 |
| NOS1     | Rabbit | 1:200     | Santa Cruz sc-648                                                                                                                                                 |                                 |
| NOS1     | Mouse  | 1:300     | Santa Cruz sc-5302                                                                                                                                                |                                 |
| NPY      | Rabbit | 1:3,000   | Immunostar 22940                                                                                                                                                  |                                 |
| NTNG1    | Rabbit | 1:200     | Abcam ab221456                                                                                                                                                    |                                 |
| NTNG1    | Mouse  | 1:400     | Santa Cruz sc-271774                                                                                                                                              |                                 |
| NXPH2    | Rabbit | 1:200     | Atlas Antibodies HPA034759                                                                                                                                        |                                 |
| PBX1     | Rabbit | 1:1000    | Cell Signaling #4542                                                                                                                                              |                                 |
| PBX3     | Rabbit | 1:200     | Sigma AV32070                                                                                                                                                     |                                 |
| PGP9.5   | Rabbit | 1:1,000   | ThermoFisher PA5-29012                                                                                                                                            |                                 |

|                 |            |         |                               |                        |
|-----------------|------------|---------|-------------------------------|------------------------|
| PGP9.5          | Mouse      | 1:300   | Novus Bio NB600-1160          |                        |
| PIEZO2          | Rabbit     | 1:200   | LifeSpan LS-C180178           | mainly in processes    |
| Pro-CCK         | Rabbit     | 1:800   | Frontiers Institute AB2571674 | Extremely weak         |
| RFP/Tomato/Ruby | Rat        | 1:1,000 | Chromotek, 5F8                |                        |
| RPRML           | Rabbit     | 1:3,000 | Atlas Antibodies HPA062668    |                        |
| SOM             | Rat        | 1:300   | Merck MAB354                  |                        |
| Sox10           | Goat       | 1:2,000 | R&D Systems AF2864            |                        |
| Sox2            | Rabbit     | 1:4,000 | Seven Hills WRAB-1236         | tissue becomes dotty   |
| Substance P     | Rabbit     | 1:1,000 | Chemicon 1566                 |                        |
| Substance P     | Rat        | 1:100   | Biorad 8450-0505              |                        |
| TH              | Rabbit     | 1:500   | Pelfreeze P40101              |                        |
| TH              | Sheep      | 1:300   | Novus Bio NB300-110           |                        |
| UCN3            | Mouse      | 1:200   | Santa Cruz sc-517449          | strong background      |
| UCN3            | Rabbit     | 1:1,000 | Biomatik CAU23545             |                        |
| VGLUT2          | Guinea pig | 1:5,000 | Millipore AB2251              | Enhanced by colchicine |
| VIP             | Rabbit     | 1:200   | AbD Serotec 9535-0204         |                        |

|  |                                |
|--|--------------------------------|
|  | Good staining                  |
|  | OK staining                    |
|  | Weak staining                  |
|  | Unspecific/undetected staining |

### Secondary antibodies used in the study

| Alexa Fluor 488/FITC<br>(dilution 1:400)            | Alexa Fluor 555/594<br>(dilution 1:1,000)        | Alexa Fluor 647/Cy5<br>(dilution 1:250)           |
|-----------------------------------------------------|--------------------------------------------------|---------------------------------------------------|
| Donkey anti-goat 488<br>ThermoFisher A11055         | Donkey anti-goat 555<br>ThermoFisher A21432      | Donkey anti-goat 647<br>ThermoFisher A21447       |
| Donkey anti-guinea pig 488<br>Jackson 706-545-148   | Goat anti-guinea pig 555<br>ThermoFisher A21435  | Donkey anti-guinea pig Cy5<br>Jackson 706-175-148 |
| Donkey anti-mouse 488<br>ThermoFisher A21202        | Donkey anti-mouse 555<br>ThermoFisher A31570     | Donkey anti-mouse 647<br>ThermoFisher A31571      |
| Goat anti-mouse IgG1 488<br>ThermoFisher A21121     | Goat anti-mouse IgG1 555<br>ThermoFisher A21127  | Goat anti-mouse IgG1 647<br>ThermoFisher A21240   |
| Goat anti-mouse IgG2a 488<br>ThermoFisher A21131    | Goat anti-mouse IgG2a 555<br>ThermoFisher A21137 | Goat anti-mouse IgG2a 647<br>ThermoFisher A21241  |
| Goat anti-mouse IgG2b 488<br>ThermoFisher A21141    |                                                  | Goat anti-mouse IgG2b 647<br>ThermoFisher A21242  |
| Rat anti-mouse IgG1 FITC<br>ThermoFisher 11-4015-82 |                                                  |                                                   |
| Donkey anti-rat 488<br>ThermoFisher A21209          | Donkey anti-rat 594<br>ThermoFisher A21208       | Goat anti-rat 647<br>Cell Signaling 4418S         |
| Donkey anti-rabbit 488<br>ThermoFisher A32790       | Donkey anti-rabbit 555<br>ThermoFisher A31572    | Donkey anti-rabbit 647<br>ThermoFisher A31573     |
| Donkey anti-sheep 488<br>ThermoFisher A11015        | Donkey anti-sheep 555<br>ThermoFisher A21436     |                                                   |
